## Biochemical characterisation of human transglutaminase 4

Zsuzsa Csobán-Szabó <sup>1,2</sup>, Bálint Bécsi <sup>3</sup>, Saïd El Alaoui <sup>4</sup>, László Fésüs <sup>1</sup>, Ilma Rita Korponay-Szabó <sup>5</sup> and Róbert Király <sup>1,\*</sup>

<sup>1</sup>Department of Biochemistry and Molecular Biology, Faculty of Medicine, University of Debrecen, Debrecen, Hungary; [szabo.zsuzsa@med.unideb.hu](mailto:szabo.zsuzsa@med.unideb.hu) (Z.C-S); [fesus@med.unideb.hu](mailto:fesus@med.unideb.hu) (L.F.); [kiralyr@med.unideb.hu](mailto:kiralyr@med.unideb.hu) (R.K)

<sup>2</sup>Molecular Cell and Immunobiology Doctoral School, University of Debrecen, Debrecen, Hungary;

<sup>3</sup>Department of Medical Chemistry, Faculty of Medicine, University of Debrecen, Debrecen, Hungary; [bbalint@med.unideb.hu](mailto:bbalint@med.unideb.hu)

<sup>4</sup>Research Department, Covalab S.A.S, Lyon, France, [elalaoui@covalab.com](mailto:elalaoui@covalab.com)

<sup>5</sup>Department of Pediatrics, Faculty of Medicine, University of Debrecen, Debrecen, Hungary; [ilma.korponay-szabo@tuni.fi](mailto:ilma.korponay-szabo@tuni.fi)

\*Correspondence: [kiralyr@med.unideb.hu](mailto:kiralyr@med.unideb.hu); Tel.: (+36-52-416-432)

### Abstract:

Transglutaminases are protein modifying enzymes involved in physiological and pathological processes with potent therapeutic possibilities. Human TG4, also called prostate transglutaminase, is frequently associated with pathological symptoms and particularly with cancer invasiveness. Although rodent TG4 is well characterised, biochemical characteristics of human TG4 that could help the understanding of its way of action are not published. First, we analysed proteomics databases and found that TG4 protein is present in human tissues beyond the prostate. Then, we studied *in vitro* the transamidase activity of human TG4 and its regulation using the microtiter plate method. Human TG4 has low transamidase activity which prefers slightly acidic pH and a reducing environment. It is enhanced by submicellar concentrations of SDS suggesting that membrane proximity is an important regulatory event. Human TG4 does not bind GTP as tested by GTP-agarose and BODIPY-FL-GTPγS binding, and its proteolytic activation by dispase or when expressed in AD-293 cells was not observed either. We identified several potential human TG4 glutamine donor substrates in the AD-293 cell extract by biotin-pentylamine incorporation and mass spectrometry. Several of these potential substrates are involved in cell-cell interaction, adhesion and proliferation, suggesting that human TG4 could become an anticancer therapeutic target.

**Keywords:** transglutaminase; TG4, TGp, protein crosslinking; enzyme activity, substrate search, proteomic analysis, tissue distribution, database reanalysis, prostate cancer

## 1. Introduction

Transglutaminases are protein modifying enzymes sharing a Cys-His-Asp catalytic triad [1]. Their most prevalent enzymatic activity is the  $\text{Ca}^{2+}$ -dependent formation of  $\text{N}^{\epsilon}(\gamma\text{-glutamyl})\text{lysine}$  isopeptide bond between glutamine and lysine residues of proteins or incorporation of biogenic amines into protein's glutamine residues [2]. This crosslinking activity plays an essential role in the clotting of body fluids by secreted transglutaminases, Factor XIII-A (FXIII-A) [3] and prostate-specific transglutaminase (transglutaminase type 4, TG4, TGp), which are involved in two analogous biological processes, blood clotting and copulatory plug formation [4], respectively. While blood clotting Factor XIII-A is a well-characterised enzyme, TG4 is, however, a less studied member of the transglutaminase enzyme family.

In rodents, TG4 is highly expressed in the coagulating glands and contributes to the formation of the copulatory plug, which is an insoluble protein polymer formed upon ejaculation of the seminal fluid in the vagina [4]. In TG4<sup>-/-</sup> mice, the copulatory plug formation is missing, and this is associated with decreased litter size and reduced fertility [5]. TG4 also may be involved in the suppression of the antigenicity of sperm cells because inhibition of transglutaminase activity in rabbit prostatic fluid restores the lymphocyte stimulation by the spermatozoa, which was also confirmed in a rat model [6, 7]. Although TG4 is called prostate-specific transglutaminase, it is also expressed in mouse aortic smooth muscle cells and vena cava [8]. Rat and mouse TG4 are well characterised from purified enzymes from the coagulating glands or from cloned proteins [9, 10, 11, 12, 13, 14], but our knowledge about human TG4 is feeble.

Human TG4 (hTG4) is expressed in the prostate and present in the seminal fluid, but there is no copulatory plug formation in humans. Human TG4 may still regulate semen viscosity and the maturation and immunogenicity of sperm cells [15, 16]. hTG4 is also present in the saliva [17] and in the vesicular fraction of urine [18]. Human TG4 is frequently expressed by breast and prostate cancer cells, in which it is an adverse prognostic marker associated with higher invasiveness [19, 20]. hTG4 is an autoantigen in autoimmune polyendocrine syndrome type 1, and contributes to the development of prostatitis resulting in male infertility [21]. These presumed roles of hTG4 look controversial since evolutionary biology studies claim that the gene of TG4 (TGM4) is dead, has lost its biological function due to the lack of copulatory plug formation [22] and its high polymorphism in humans [23] indicates low evolutionary pressure and dispensability. Indeed, there is a lack of both detailed biochemical characterisation and demonstration of the biological significance of hTG4 in physiological and pathological processes.

Our study aimed to characterise the enzymatic properties of hTG4 experimentally, as well as to collect and analyse the publicly available human-related expression data at the protein level. Our experiments and proteomics database analyses show that human TG4 is expressed in various parts of the gastrointestinal tract in addition to the male genital organs. hTG4 has a low catalytic transglutaminase activity preferring slightly acidic pH and reducing conditions and sodium dodecyl sulphate (SDS) can enhance it. Human TG4 has lost its GTP binding property and is potentially being under evolutionary changes. Potential cellular substrates identified in this study support the theory that hTG4 can modulate cell adhesion and migration, influencing cancer invasiveness.

## 2. Results

### 2.1. Analysis of proteomics datasets for the expression of hTG4 protein in the human body

In order to collect evidence about the tissue expression of hTG4 databases were checked. The Human Protein Atlas was created based on immunohistochemistry, and the applied antibodies are roughly validated based on consistency with the RNA expression data in various tissues [25]. According to this database, hTG4 is expressed in the prostate and skeletal muscle at the protein level under physiological conditions. In addition, it was also present in one breast cancer sample showing strong staining and cytoplasmic/membraneous localisation. In prostate cancers presence of hTG4 also was detected several times with various intensity staining, mostly having cytoplasmic and membraneous localisation, but hTG4 is not considered as a prognostic marker of these tumours. The appearance and spread of high sensitivity mass spectrometers opened another approach to screen protein expressions.

In the Uniprot database, hTG4 is linked to several proteomics databases, of which MassIVE [26], Peptide Atlas [27] and Proteomics DB [28] provide the possibility to reach detailed experimental settings and gained meta-data of each observed hTG4 peptides in various projects. By reviewing these databases and analysing the meta-data of each observed hTG4 peptide, experimental conditions and sample origin, we collected 42 tissues where peptide fragments of hTG4 were detected (Supplementary tables 1 and 2).

Due to sequence similarity between various proteins, particularly in the case of transglutaminase enzyme family members, there are observed peptides that are shared between proteins. The YPEGSSSEER peptide or its posttranslationally modified forms are very commonly detected, but it also can be found in the hTG2 sequence. In many tissues, hTG4 was detected only based on this one shared peptide. After exclusion of these non-unique peptides, the presence of hTG4 could be confirmed by unique peptides only in 9 tissues (Table 1.) These data support that besides the male genital tract, hTG4 is present physiologically in the fetal heart, spleen, salivary glands, colon and urinary bladder.

**Table 1. Human TG4 expressing tissues based on detected unique peptides in MassIVE, PeptideAtlas or ProteomicsDB databases.**

| Tissue          | MassIVE | PeptideAtlas | ProteomicsDB |
|-----------------|---------|--------------|--------------|
| Colon           | ++      | ++           | +            |
| Heart           | +       | ++           | ++           |
| Prostate        | ++      | ++           | ++           |
| Salivary gland  | -       | -            | ++           |
| Seminal plasma  | ++      | ++           | ++           |
| Seminal vesicle | ++      | ++           | ++           |
| Spermatozoon    | ++      | ++           | -            |
| Spleen          | -       | +            | ++           |
| Urinary bladder | ++      | ++           | ++           |

-: not detected

+: detected only with non-unique peptides

++: detected with unique peptides.

### 2.2. hTG4 has curiously low transamidase activity in the transglutaminase family

To characterise hTG4 experimentally, we produced recombinant hTG4 and tested its transamidase activity. Since there are no data on the best hTG4 substrates, the widely used so-called microtiter plate biotin-pentylamine incorporation assay was used. The transamidase activity of 0.5 µg hTG4 was 0.62 ± 0.29 mAbs/min, which is extremely lower than the positive control recombinant human TG2 (29.25 ± 5.93 mAbs/min; at 5 mM [Ca<sup>2+</sup>]). The transamidase activity of commercial recombinant hTG4 (Zedira) was similar to our homemade enzyme. Then, the effect of increasing amounts of hTG4 was measured on the transamidase activity, which demonstrated a linear correlation (Figure 1A). To further confirm

the measurement of transamidase activity, the  $\text{Ca}^{2+}$ -dependence was also tested (Figure 1B). hTG4 activity demonstrated an optimal  $[\text{Ca}^{2+}]$  at 5 mM. A higher  $\text{Ca}^{2+}$  level (10 mM) showed an inhibitory effect on the activity, probably due to the precipitation of the protein.

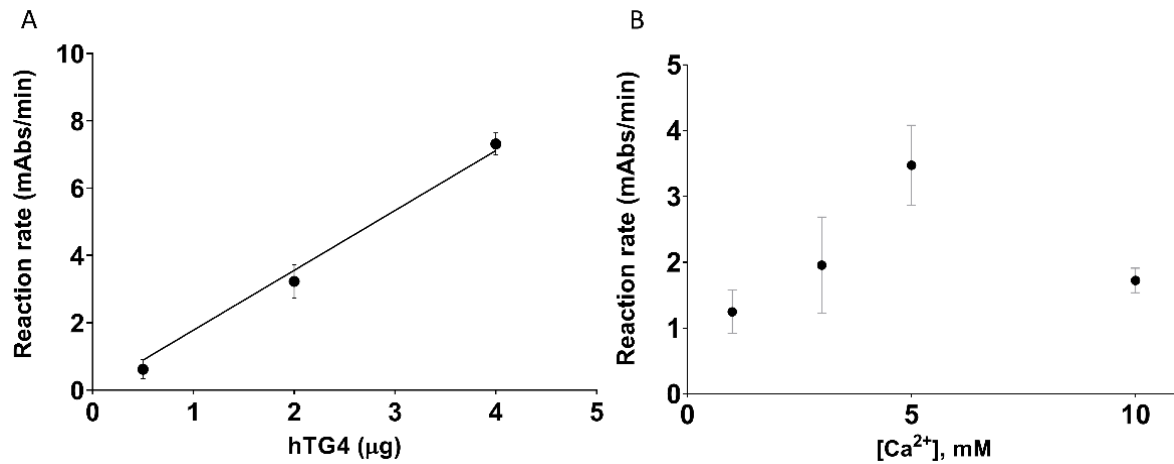

**Figure 1. Transamidase activity of human TG4.** Effect of increasing hTG4 enzyme amount on the transamidase activity (A) was measured in the presence of 0.5, 2 and 4  $\mu\text{g}$  hTG4 protein. The calcium-dependence of hTG4 transamidase activity was tested between 1-10 mM calcium concentration range in the presence of 2.5  $\mu\text{g}$  enzyme (B). All data are represented as means with  $\pm\text{SD}$  using Graph Pad Prism 8 from 3 independent measurements done in duplicates.

The Zedira GmbH (Germany) sells recombinant human transglutaminases and shares the transamidase activities of these proteins measured by a kinetic dansyl cadaverine incorporation assay (Table 2). These activity values support our observation and confirm that hTG4 has a very low transamidase activity compared to the other transglutaminases.

**Table 2. Comparison of transamidase activity of human recombinant transglutaminases.** Transamidase activities of TG1, TG2, TG3, TG4 and TG7 were collected from the Zedira GmbH (Germany) website ([www.zedira.com](http://www.zedira.com)), from the products datasheets. The activity values were uniformly determined by measuring the incorporation of the dansyl-cadaverine into N,N-dimethylated casein.

| Human transglutaminase | Article-No. | Transamidase activity (U/mg) | Expression host |
|------------------------|-------------|------------------------------|-----------------|
| TG1                    | T009        | ~2,500                       | <i>E. coli</i>  |
| TG2                    | T001        | ~750                         | <i>E. coli</i>  |
| TG3                    | T024        | ~1,000                       | Insect cells    |
| TG4                    | T042        | ~30                          | <i>E. coli</i>  |
| TG7                    | T011        | ~1,000                       | <i>E. coli</i>  |

### 2.3. Effect of pH, reducing/oxidising environment, and sodium-dodecyl sulfate on hTG4 transamidase activity

As a next step, we further characterised the transamidase activity of hTG4 under various conditions and searched for regulatory mechanisms that might be responsible for the activation of hTG4, leading to high enzymatic activity. The pH influences the activity of enzymes, either promoting the catalytic mechanism or influencing the solubility of the protein at their isoelectric point. Human TG4 demonstrated slightly higher activities at lower pH values, below pH 7 (Figure 2A). The pH-dependence curve suggests that the isoelectric point of hTG4 is around pH 7.0.

Transglutaminases are also known to be sensitive to the reducing/oxidising environment altering the state of vicinal thiol groups in the protein. Transamidase activity of hTG4 was measured in the presence of various ratios of reduced and oxidised (GSH/GSSG) glutathione (Figure 2B). The results demonstrate that hTG4 prefers the reducing condition to express increased transamidase activity.

As low amounts of SDS potentially enhance rat TG4 activity, the effect of increasing SDS concentrations was tested on hTG4 transamidase activity (Figure 2C). Indeed, 0.5 mM SDS resulted in an approximately four times increase in hTG4 transamidase activity, while higher SDS concentrations were rather inhibitory. This enhancing effect of SDS was not observed in the case of hTG2, where increasing SDS resulted in the inactivation of the enzyme. However, SDS in small concentrations enhanced the activity of hTG4, but still, the activity values were lower than in the hTG2 catalysed reactions.

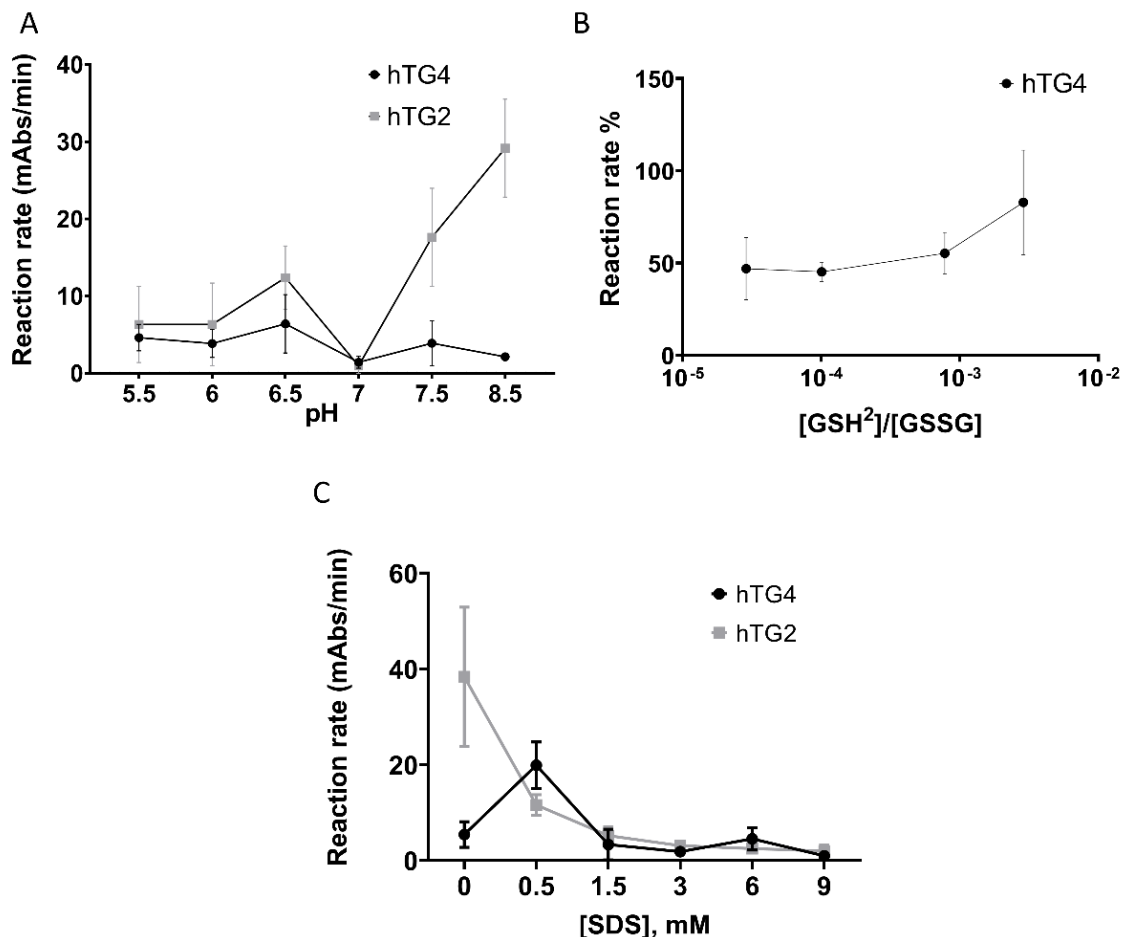

**Figure 2. Effect of pH, reducing/oxidising environment, and sodium-dodecyl sulfate on hTG4 transamidase activity.** The pH dependence of hTG4 and hTG2 transamidase activities between 5.5-8.5 pH range (A). Effect of redox conditions on hTG4 transamidase activity (B). To observe the effect of the reducing conditions 2.4 mM GSSG was combined with 0, 0.24, 0.45, 1.25, or 2.4 mM GSH in the microtiter plate reaction mixture [24]. The ratio of [GSH]<sup>2</sup> to [GSSG] was calculated from their molar concentrations. Transamidase activities of hTG4 and hTG2 in the presence of various SDS concentrations were tested (C). The enzyme amount was 2.5  $\mu$ g in each experiment. All data are represented as means with  $\pm$ SD using Graph Pad Prism 8 from 2 or 3 independent measurements done in triplicates.

#### 2.4. Thermal stability of recombinant hTG4 protein

Due to the low activity values, it was suspected that hTG4 could have low stability. To characterise the thermal stability of the protein, nano differential scanning fluorimetry (nanoDSF) was applied. The NanoTemper Prometheus machine determines, without protein labelling, the thermal unfolding by measuring the intrinsic Trp fluorescence while raising temperature under native conditions. Proteins with a higher unfolding transition temperature ( $T_m$ , where 50% of the protein is unfolded) are more stable. Applying a serial hTG4 dilution, the average  $T_m$  value of hTG4 was  $62.6 \pm 0.23$  °C (Figure 3). The  $T_{onset}$ , the temperature where the protein starts to unfold, was  $56.1 \pm 1.34$  °C. At the applied protein concentration range, there is no sign of other structural transition, like dissociation. Considering the general human body temperature, hTG4 demonstrates high thermal stability, indicating a stable native structure in physiological conditions. This observation raises up the possibility of a still unknown scaffolding function of hTG4.

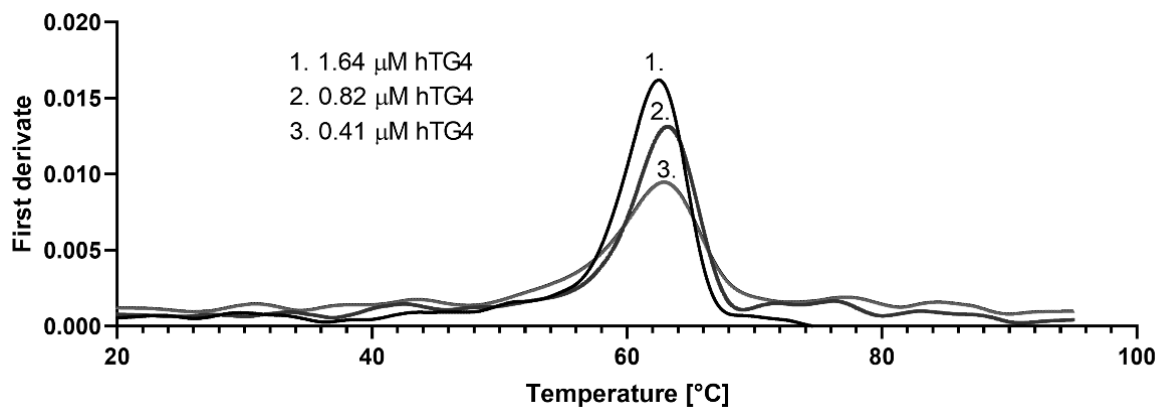

**Figure 3. Thermal stability of recombinant hTG4 protein.** Nano differential scanning fluorimetry was used to determine  $T_m$  values, demonstrating the melting scan by the first derivate versus temperature applying 1.64, 0.82 and 0.41  $\mu\text{M}$  hTG4 protein.

#### 2.5. Human TG4 does not bind GTP

Intracellular transglutaminases are often regulated by guanine nucleotide-binding. Although hTG4 is a secreted transglutaminase, considering its possible intracellular function and location, the GTP binding property of the enzyme was tested using the fluorescent BODIPY-FL-GTP $\gamma$ S reagent (Figure 4). In the case of a binding event, a protein concentration-dependent fluorescent intensity increase was expected. Due to the lack of changes, recombinant hTG2 was used as a positive control in 1000 nM concentration, which resulted in an approximately four times higher relative fluorescence compared to hTG4, ensuring the correctness of the experimental conditions.

In order to confirm the lack of GTP binding property of hTG4, GTP-agarose and consequent Western blot were used (Figure 4, inlet). The results demonstrate that GTP-agarose resin can not bind hTG4 protein, while the separation was successful with the positive control hTG2. The two independent results prove that guanine nucleotide does not have a binding site and regulatory effect on hTG4.

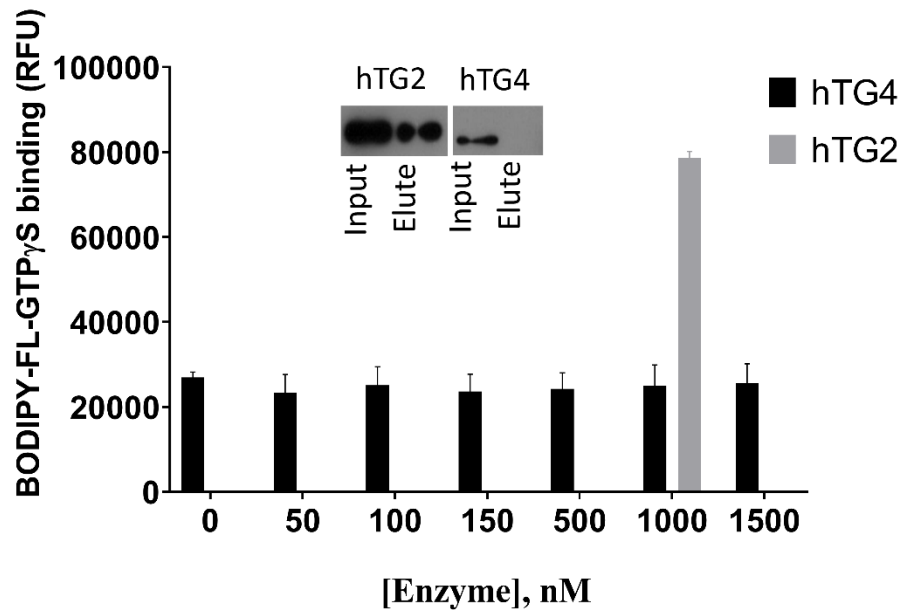

**Figure 4. Human TG4 does not bind BODIPY-GTP $\gamma$ S or GTP.** Increasing concentrations of hTG4 (50, 150, 250, 500, 1000 or 1500 nM) were incubated with 500 nM BODIPY-GTP $\gamma$ S for 5 minutes, and then the fluorescence intensity was measured (Ex/Em: 485/520 nm). Data are presented as means with  $\pm$ SD from two separate experiments done in triplicates. As a positive control, 1000 nM hTG2 was applied, resulting in  $78629 \pm 1531,60$  RFU. The inset shows the binding property of hTG2 and hTG4 to GTP-agarose resin. Representative picture of Western blots after SDS-PAGE from two independent experiments using monoclonal anti-polyHis/HRP antibody.

#### 2.6. Limited proteolysis of hTG4 by thrombin or dispase does not activate hTG4

Transglutaminases could also be regulated by limited proteolysis. In order to test the potential activation of hTG4 by thrombin or dispase, first, the protein sequence was checked *in silico* for cleavage sites, using ExPASy-PeptideCutter online tool ([https://web.expasy.org/peptide\\_cutter/](https://web.expasy.org/peptide_cutter/)). There is no thrombin recognition site in hTG4 based on the Peptide Cutter, and we confirmed the lack of the effect of thrombin also experimentally (data not shown). Dispase recognition sites are not included in this online tool. So, recombinant His-tagged hTG4, hTG2, and hTG3 were tested for limited proteolysis experimentally by dispase I and II proteases (Figure 5A). Dispase I shows higher proteolytic activity than dispase II. Western blot analysis using both anti-polyHis/HRP antibody and monoclonal anti-TG4 antibodies demonstrated that dispase I degrades hTG4 wholly and rapidly, while dispase II only decreased the protein level compared to the control suggesting that dispases can cleave hTG4 but do not generate detectable stable fragments. Recombinant hTG3 was tested as a positive control where the anti-TG3 and the anti-polyHis-tag antibodies detected the stable proteolytic N-terminal TG3 fragment.

In the AD-293 cell line, a still unknown intracellular protease can activate exogenously expressed human TG5 [29]. We, therefore, checked whether hTG4 could go through a similar activation mechanism. AD-293 cells were transfected by eukaryotic pTriEx-4 Ek/LIC vector expressing hTG4. Forty-eight hours after transfection, the protein extract contained only the full-size hTG4 indicating no active protease that could modify the protein by limited proteolysis (Figure 5B). While the attempts to find an activator mechanism by limited proteolysis were unsuccessful, in further experiments, we tried to find high-affinity substrates to demonstrate significant catalytic hTG4 activity.

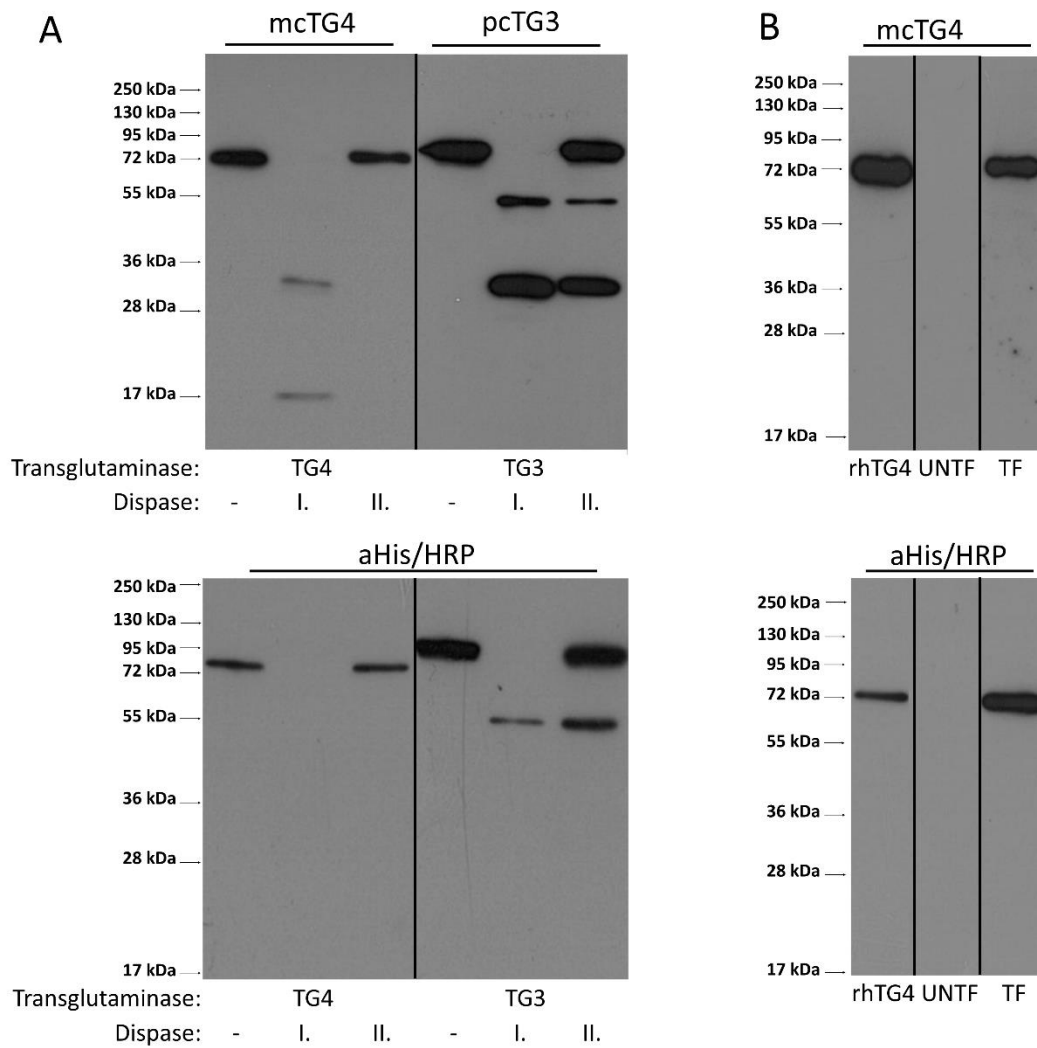

**Figure 5. Activation of hTG4 by limited proteolysis does not occur upon dispase digestion or its expression in AD-293 cells.** (A) The effects of dispase I and II on hTG4 protein were examined by Western blot analysis. Recombinant hTG3 or hTG4 were incubated for 60 minutes at 37°C, in the presence of 5 mM Ca<sup>2+</sup> alone or with the same amount of either dispase I or dispase II. From each reaction, 0.3 µg transglutaminase protein was tested by Western blot using monoclonal anti-TG4 (mcTG4) or polyclonal anti-TG4 (pcTG4) antibodies (upper part) and anti-polyHis/HRP antibody (aHis/HRP). Representative gel pictures of 2 independent experiments are presented. (B) AD-293 cells express exogenous hTG4 in full-length form without significant limited proteolysis revealed by Western blot. 0.3 µg recombinant hTG4 (rhTG4) was used as positive control while 10 µg protein extract of untransfected (UNTF) and transfected AD-2393 cells (TF) were examined. Representative picture from 3 independent experiments. The vertical lines on the blots are labelling the place of the membrane cuttings.

### 2.7. Human TG4 incorporates biotin-pentylamine into several proteins in AD-293 cell extract

The observed low hTG4 transamidase activity raises the possibility that the application of unpreferred substrates may be responsible for the measured low enzymatic activity. The existence and presence of efficient glutamine-donor protein substrates of hTG4 were tested in AD-293 cell protein extract. AD-293 cells do not contain any transglutaminases and do not possess any transamidase activity (Figure 6A). When the AD-293 cellular extracts were incubated with recombinant hTG4 in the presence of Ca<sup>2+</sup>, several protein bands appeared, having incorporated biotin-pentylamine (BPA). Before the hTG4-dependent BPA labelling, the nuclear (N) and cytoplasm (Cp) fractions of AD-293 cells were separated to increase the efficiency of protein identification. Recombinant hTG4 efficiently incorporated BPA into several proteins in both fractions of the three biological replicates (Figure 6B). To enrich the ratio of BPA labelled proteins, NeutrAvidin-agarose affinity chromatography was applied (Figure 6C), and then the



mixtures were sent for mass spectrometry-based (LC-MS/MS) protein identification. While NeutrAvidin-agarose could bind cellular proteins in a nonspecific way, the control samples contained the proteins eluted from the NeutrAvidin-agarose after its incubation with AD-293 cell protein extract.

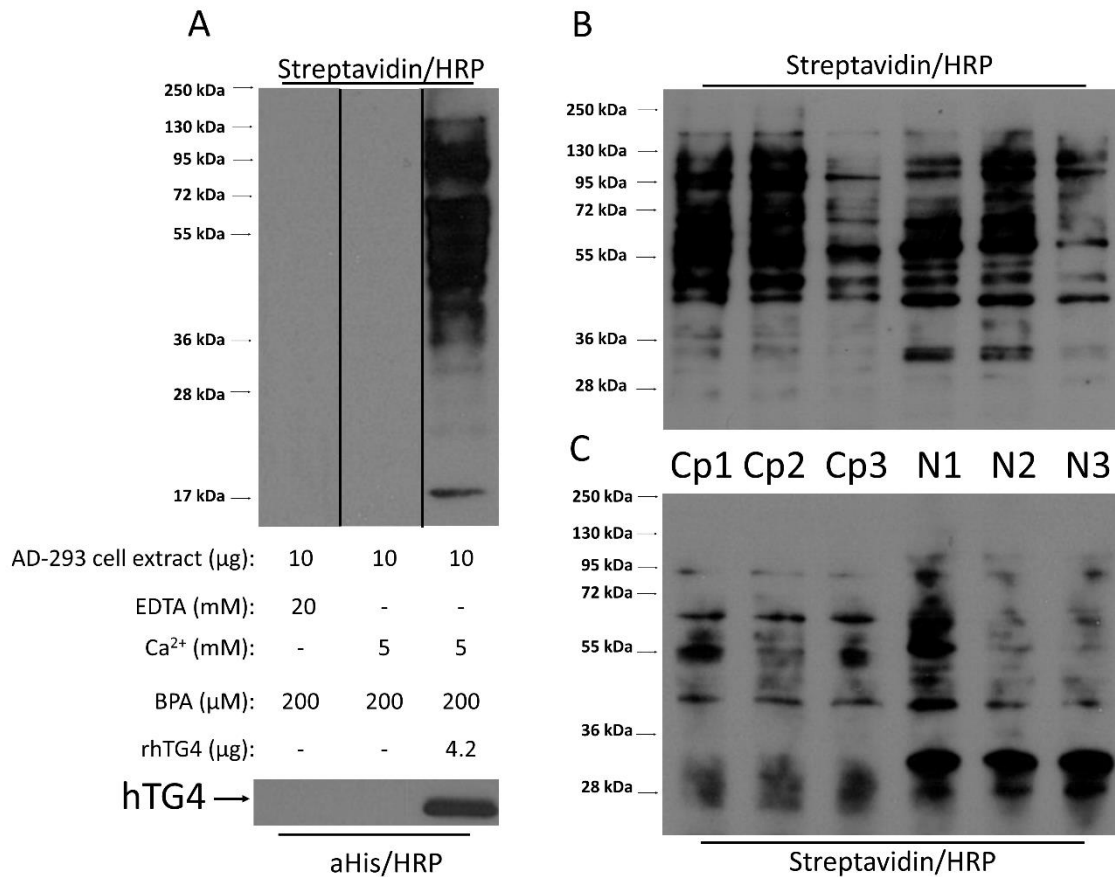

**Figure 6. Verification of biotin-pentylamine (BPA) modified proteins in AD-293 cell extract upon incubation with hTG4 and monitoring their subsequent affinity purification.** (A) BPA incorporation via hTG4 transamidase activity into AD-293 cell extract examined by Western blot, using Streptavidin/HRP for detection. The bottom part of the Western blot picture shows the presence of hTG4 in the sample, detected using anti-polyHis-tag/HRP. The vertical lines on the blot are labelling the place of the membrane cuttings. Representative picture from 2 independent experiments. The reaction conditions are summarised in the picture. BPA incorporation into AD-293 cytoplasmic (Cp) and nuclear (N) fractions directly after the enzyme reaction (B) and after the separation of the BPA containing substrates by NeutrAvidine Agarose (C). Western blots using Streptavidin/HRP for detection.

After subtracting the non-specifically bound proteins identified in the controls, mass spectrometry analysis revealed 8 proteins from the cytoplasm and 230 proteins from the nucleus as potential hTG4 substrates (Supplementary Table 3). All analyses were done from 3 independently prepared cytoplasmic and 3 nuclear fractions. The recognised proteins could be either substrates or interacting proteins of the substrates. The detection of a BPA modified peptide fragment of the protein could prove the presence of reactive glutamine. Therefore, in the next step, we selected the proteins in which BPA labelled peptide was detected. In the cytoplasmic fractions, Keratin, type II cytoskeletal 1 and Keratin, type I cytoskeletal 9 got only BPA label, but the unmodified form of these proteins were also identified in the control samples. Their BPA modifications could prove that hTG4 can use them as substrates. In the nuclear fraction, only Insulin-like growth factor 2 mRNA-binding protein 1 was BPA modified. Further study would be needed to confirm and determine the reactive glutamine in the other proteins. Human TG4 was also detected in two out of the three cytoplasmic and all nuclear samples. It is conceivable that hTG4 can crosslink itself with an already BPA labelled substrate using another reactive residue or co-purified with a BPA labelled substrate.

Previously, when the evaluation of the proteomics dataset focused on protein identification in the enriched substrate fractions, only the existence of three substrate proteins was confirmed by BPA modifications. If we apply another approach for the data analysis and focus on BPA modified peptides, we could also find existing substrate proteins, and in the same time, prove which is the reactive glutamine residue. We filtered the dataset for the presence of BPA modification in the peptide fragments and removed the previously applied filtering parameters, which are valid for protein determination. We found 105 proteins that contain incorporated BPA. Each peptide's MS/MS spectrum was verified, and hits, where at least four consequent b or y fragment ions were present, are listed in Table 3 (the 20 peptides are related to 18 proteins because two proteins contain two peptide fragments).

**Table 3. Potential eighteen hTG4 substrate proteins containing BPA modified peptides detected with at least four consequent fragment ion series.** Reactive glutamines are labelled by underlined and bold letters.

| Accession | Identified protein                                          | Cellular localisation                         | Total spectrum count | Reactive Q +- 5 AA            |
|-----------|-------------------------------------------------------------|-----------------------------------------------|----------------------|-------------------------------|
| B4GT5     | Beta-1,4-galactosyltransferase 5                            | Golgi apparatus                               | 13                   | AQVYEQ <u><b>Q</b></u> VLRSA  |
| AGRL3     | Adhesion G protein-coupled receptor L3                      | Cell membrane                                 | 2                    | HGSTIQ <u><b>Q</b></u> LSANT  |
| ENO4      | Enolase 4                                                   | Cytosol                                       | 4                    | SKRGGQ <u><b>Q</b></u> QITGK  |
| CMYA5     | Cardiomyopathy-associated protein 5                         | Cytoplasm, Nucleus                            | 4                    | SDLGRQ <u><b>Q</b></u> SGSIG  |
| CHD1      | Chromodomain-helicase-DNA-binding protein 1                 | Cytoplasm, Nucleus                            | 1                    | LEHTRQ <u><b>Q</b></u> CLIKI  |
| SAM15     | Sterile alpha motif domain-containing protein 15            | ?                                             | 1                    | VPEEMQ <u><b>Q</b></u> RKATE  |
| GRIN3     | G protein-regulated inducer of neurite outgrowth            | Plasma membrane                               | 2                    | LPAQRQ <u><b>Q</b></u> MSRFK  |
| K2C79     | Keratin, type II cytoskeletal 79                            | Cytoskeleton, Cytosole, Extracellular exosome | 1                    | AEAWYQ <u><b>Q</b></u> TKYEE  |
| PCDH17    | Protocadherin-17                                            | Cell membrane                                 | 1                    | HNAKCCQ <u><b>Q</b></u> LSLEV |
| F10A5     | Putative protein FAM 10A5                                   | Cytoplasm                                     | 1                    | PNAAIQ <u><b>Q</b></u> DCDRA  |
| PCDB3     | Protocadherin beta-3                                        | Cell membrane                                 | 1                    | NKQHFQ <u><b>Q</b></u> LSHQIT |
| STAB2     | Stabilin-2                                                  | Cytoplasm, Cell membrane                      | 1                    | VARCSQ <u><b>Q</b></u> KGTKV  |
| PLXA2     | Plexin-A2                                                   | Cell membrane                                 | 1                    | AVDGGQ <u><b>Q</b></u> DYFPT  |
| F155A     | Transmembrane protein FAM155A                               | Membrane                                      | 1                    | DKEHQQ <u><b>Q</b></u> QQRQQ  |
|           |                                                             |                                               |                      | QRQQQ <u><b>Q</b></u> QQQQQ   |
| ALKB8     | Alkylated DNA repair protein alkB homolog 8                 | Nucleus, Cytoplasm                            | 1                    | GCDRSQ <u><b>Q</b></u> NLVDI  |
| IL6RA     | Interleukin-6 receptor subunit alpha                        | Cell membrane, Secreted                       | 1                    | PAEDFQ <u><b>Q</b></u> EPCQY  |
| ZN363     | RING finger and CHY zinc finger domain-containing protein 1 | Cytoplasm, Nucleus                            | 1                    | LAMNLQ <u><b>Q</b></u> GRHKC  |
| FAM18A    | Protein FAM184A                                             | ECM                                           | 1                    | LCAEAQ <u><b>Q</b></u> HVQRI  |
|           |                                                             |                                               |                      | EAQHVQ <u><b>Q</b></u> RIVTM  |

Based on these twenty selected hTG4-modified peptides, we have analysed the linear environment of the reactive Gln residues (Figure 7). Unfortunately, it is not possible to deduce an obvious consensus recognition sequence for hTG4. But, hTG4 prefers poly-glutamine tracts and Glu, which could be the

result of a transglutaminase-dependent deamidation. Leu, Arg, Ser, and Val amino acids also are frequent in the linear surrounding area of the reactive Gln residue.

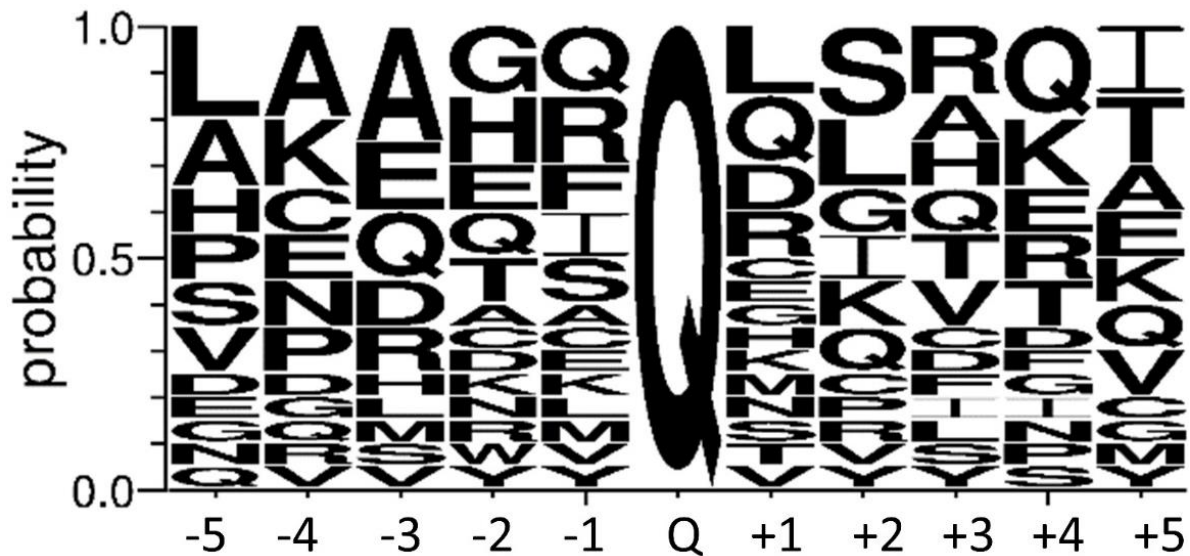

**Figure 7. Probability of the amino acid residues between the -5 and +5 position to the reactive glutamine.** Sequence logo created using the 20 most reliable peptide sequences containing the detected BPA modified Q with its surrounding amino acid residues in both directions. The size of the amino acid letter represents the probability of the given amino acids in the substrate recognition region (created by WebLogo 3.8.4.).

### 3. Discussion

Human transglutaminases are getting higher interest due to their biological functions and potential medical relevance, but there is a blind spot in human TG4 biochemical properties and tissue distribution. Previously, it was demonstrated that human TGM4 is expressed in several tissues but a minimum of 200 times lower level than in the prostate [30]. Recently, other studies got a similar conclusion at both RNA and protein levels that human TGM4 expression exists, but it is minimal in non-prostatic tissues [31]. In mice, TG4 is also expressed at the protein level in the vena cava and aortic smooth muscle cells [8]. In our study, for higher reliability focusing on unique peptides, we reanalysed public proteomics data to confirm that TG4 protein is present in various human tissues outside the prostate. Based on our analysis, it could be present in the fetal heart, colon and salivary gland, which could be the source of salivary TG4 [17]. Sandwich ELISA assay demonstrated that TG4 is also present in the blood sera with a still unknown source, similar to the PSA antigen detected at ultra-low levels in female sera [32]. Based on the transcription data of TGM4 gene, it is possible that the application of higher sensitivity mass spectrometric devices and techniques will lead to the detection of hTG4 protein at a low level in the intestine and outlet of secretory epithelial structures similar to the salivary gland and saliva [17].

The catalytic properties of hTG4 were tested using immobilised N,N dimethylated-casein and soluble biotin-pentylamine, which are generally accepted substrates for the whole transglutaminase enzyme family. This is one of the most sensitive transglutaminase assays, but the observed hTG4 activity values were low, even in the increased amount of the enzyme. Human TG2 was used as a positive control to prove that the experimental settings were appropriate. We have tested several experimental conditions, but only low SDS concentrations were able to enhance the transamidase activity of hTG4. A similar phenomenon was observed in the case of mouse TG4, which showed increased activity in the presence of approximately 1.5 mM SDS [10], which is not unique, but a rare enzymatic property also presents in the case of polyphenol oxidase [33]. Usually, SDS causes denaturation and inactivation of the proteins. In the submicellar concentration (<1.5 mM) SDS could form an equilibrium intermediate [34], very probably resulting in a loosed, relaxed structure contributing to the active conformation. Further increase of the SDS leads to the complete denaturation of the protein. The observed high thermal

stability of hTG4 further supports this theory. SDS could bind to hTG4 by hydrophobic and electrostatic interactions [10], either increasing its solubility or loosening the inactive conformation. Another possibility is that based on the low similarity with other transglutaminases, TG4 could have less Ca<sup>2+</sup>-binding sites. *In vitro*, isolated rat TG4 is active without exogenously added calcium-ion but demonstrated 2 high-affinity calcium-binding sites [10]. The difference between calcium-binding properties in the transglutaminase family could be responsible for the generally observed low transamidase activity of hTG4. The SDS activation could mimic the binding of other amphipathic biomolecules regulating hTG4 activity.

Based on our results, hTG4 prefers slightly acidic pH in contrast to mouse TG4, which is active in the alkalic semen, to form a copulatory plug. This hTG4 feature correlates with the change of human sexual strategy leading to the elimination of sperm competition [35]. While hTG4 could be present in the saliva and intestine, where the pH can drop below 7, this may slightly enhance transglutaminase activity. The absence of alkalic pH preference can also help to silence potential hTG4 activity in blood circulation. Mouse TG4 demonstrated higher activity in oxidising conditions correlating with the lack of reductant in the semen. Human TG4 prefers reducing conditions suggesting that its transglutaminase activity could play a role in intracellular processes. We have tested the potential regulatory role of GTP on hTG4, but in contrast to its rat orthologue (sequence similarity is 53.3%), it cannot bind guanine nucleotide [12]. The GTP binding property of hTG2 has been well-described, and the responsible residues have been determined [36]. When the hTG4 sequence was aligned to hTG2, the similarity was low between the two human transglutaminases (42%) [37], and the GTP binding residues were missing in hTG4. We also have observed the lack of fibronectin binding sites contrary to hTG2 (Suppl. Fig. 1). The missing cellular negative GTP regulation of hTG4 can support its effect on tumour invasiveness. In prostate cancer cells, the presence of hTG4 is a negative prognostic marker [31].

The observed low catalytic hTG4 activity could originate from the lack of appropriate enzyme activation. In the transglutaminase family, several members need limited proteolysis for their activation. Physiologically thrombin cleavage is essential for FXIII-A in the blood [3]. TG1, TG3, TG5 also need proteolytic cleavages. TG1 could be activated by m-calpain,  $\mu$ -calpain, dispase and TG3 by cathepsin-L or dispase [38, 39, 40, 41]. In the case of TG5, the processing protease is still not identified, but in AD-293 cells, the exogenously expressed TG5 was present in an inactive full and in an active, proteolytically processed shorter form. Our results suggest that limited proteolysis under similar conditions may not be involved in the processing and activation of the hTG4 enzyme.

In order to acquire information on the substrate preference of hTG4, we have identified its cellular substrates using LC-MS/MS-based method. Similarly to hTG2 [42], hTG4 can use several proteins in AD-293 cells as glutamine donor substrate. After selecting the most reliable hits from the results, no consensus sequence could be determined. For reference, we have checked the TRANSDAB, transglutaminase substrate database ([http://genomics.dote.hu/mediawiki/index.php/Main\\_Page](http://genomics.dote.hu/mediawiki/index.php/Main_Page)) [43] and found that some of our newly identified hTG4 substrates are substrates for other transglutaminases as well: keratin, type II cytoskeletal 1 is a hFXIII-A, and filaggrin is hTG1 and hTG3 substrate. There are some similarities: NF-kappa-B inhibitor alpha, F-box only protein 2 and Myosin-9 are substrates of hTG2, and Coiled-coil domain-containing protein 126 is substrate of FXIII-A. Only isoforms of the previous proteins are substrates of hTG4, suggesting that hTG4 has a unique substrate recognition. This is not completely unexpected because mouse TG4 can use F2 (79-259 amino acids) fragment of the seminal vesicle secretion I (SVS I) protein as a glutamine donor while TG2 does not prefer it [44]. Interestingly, the SVS I (Uniprot code: Q6WIZ7\_MOUSE) is an amine oxidase with two reactive glutamines (Q232, Q254) and, in the case of its human orthologues (AOC1\_HUMAN, C9J2J4\_HUMAN), the reactive glutamine residues are changed to Arg or His, respectively.

Then, we have analysed the physiological and pathological roles of the identified substrate proteins. We focused on the membrane-localised proteins because hTG4 overexpression contributes to the invasiveness of prostate tumour cells, increasing their adhesion, migration. Based on the Human Protein Atlas, Adhesion G protein-coupled receptor L3 (ADGRL3) is frequently present in breast, prostate and colorectal cancers. Protocadherins, members of the cadherin family, are essential to maintain normal cell-cell interaction and are involved in the epithelial-mesenchymal transition (EMT) [45]. Plexin-A2, as a coreceptor of semaphorins, plays a role in invasive growth and cell migration. Transglutaminase dependent modification of NF-kappa-B inhibitor alpha could promote its degradation and activation of

NF-kappa-B, contributing to cell survival similarly to hTG2 [2]. Human TG4 promotes tumour and endothelial cell interaction potentially through influencing the ROCK pathway [19]. Unfortunately, no ROCK1 or ROCK2 interaction partner was found as TG4 substrate. But among the 105 identified TG4 substrates, we can find Rho guanine nucleotide exchange factor 28, which can play a role downstream of the ROCK signalling. The role of these identified substrates in cancer may initiate further studies to reveal their exact role in cancer biology, potentially leading to identifying new cancer therapeutic targets.

While TG4 has the highest polymorphism in the transglutaminase family but it is structurally very stable, we are tempted to speculate that it is on the way to gain a still unknown scaffolding function or it has some substrates contributing to the fine-tuning of biological processes potentially involved in cell proliferation, adhesion, immunological, inflammatory processes on the interfacial surfaces of the intestine, urogenital tract or circulatory vessels. To identify the potential new biological function of hTG4, further functional studies are needed.

#### 4. Materials and Methods

All materials were purchased from Sigma-Aldrich (St. Louis, MO, USA) unless otherwise indicated.

##### 4.1. Proteomics Database analysis

“PSM Provenance” table was exported from the MassIVE database (Mass Spectrometry Interactive Virtual Environment; <https://massive.ucsd.edu>) [26]. The interface of the MassIVE allows to filter the peptides according to their uniqueness by filtering the Matched Genes feature for the peptides. According to that list, the unique and the shared peptides were separated into two tables. The origin of the samples where the peptides were identified was mined out from the names of the files or based on the dataset identifier. In the case of 76 out of 3499 peptides, their origins were not available. After clicking on the observed TG4 peptides in the PeptideAtlas (<http://www.peptideatlas.org>) [27] under the „Sequence Motifs” feature, the data from the „Observed in Experiments” part was collected. Whether a given peptide was unique for hTG4 was checked in each case using NCBI Standard Protein BLAST online tool. The tissues were collected from the Experiment Names, which were always referring to the sample origin. In ProteomicsDB (<https://www.proteomicsdb.org>) [28], under the “Peptides/MSMS” tab, 49 unique and one shared hTG4 peptide can be found, which were identified in the datasets of the ProteomicsDB. Clicking on the peptide sequences, the „Peptide Details” appears, which was exported to Excel (Microsoft) in the case of each 50 peptides. Based on the Project, Experiment names, or file names the origin of the sample can be identified. In the case of publicly available datasets, clicking on the Experiment, the sample mapping can be reached.

##### 4.2. Production of recombinant human TG4

The coding part of TG4 cDNA (Uniprot code: P49221) was subcloned into pBH4 [46] bacterial expression vector using NdeI and XhoI restriction sites in the frame after an N-terminal His<sub>6</sub> tag from pDNR-LIB vector (IMAGE clone: 3950865). The appropriate insertion was checked by restriction analysis and sequencing (Eurofins Genomics). The human recombinant TG4 protein was expressed in *E. coli* BL21(DE3)pLysS bacterial cells using Terrific Broth (TB). An overnight culture was inoculated in 1:20 ratio for large scale expression and the cells were grown at 30 °C until reaching OD<sub>600</sub>=0.6. Protein expression was induced at 18 °C, in the presence of 0.2 mM isopropyl-β-D-thiogalactoside for 16-20 hours. Cells were harvested by centrifugation (6000 g, 10 mins, 4 °C) and resuspended in lysis buffer (Talon binding buffer: 50 mM phosphate buffer, 300 mM NaCl, 20 mM Imidazole, pH 7.6, containing 1 mM PMSF and 10% glycerol). After sonication and centrifugation (20 000 g, 1 h, 4 °C) the supernatant was mixed with Talon Metal Affinity Resin (Takara Bio USA, Inc.). After 1 hour incubation at 4 °C, the beads were washed using Talon buffer containing 20 mM imidazole. Proteins were eluted using 150 mM Imidazole containing Talon buffer, and the buffer was exchanged to Buffer A (50 mM Tris-HCl, pH 7.6, 0.5 mM EDTA, 15 % glycerol) using Amicon Ultra 50 K centrifugal concentrator unit (Merck). For ion exchange chromatography HiTrapQ HP Column (GE Amersham), to create gradient Buffer B

---

(Buffer A containing 1 M NaCl) were used. The protein concentrations were always determined using Bio-Rad Protein Assay Dye Reagent Concentrate (Bio-Rad). The purity of rhTG4 (better than 90%) was checked by Coomassie staining and Western blot using monoclonal anti-TG4 antibody (Covalab).

#### 4.3. Transamidase activity assay

The classical microtiter plate assay [47] was used to measure the hTG4 transamidase activity with small modifications. The transglutaminase reaction was performed in the presence of 2.5  $\mu$ g recombinant hTG4, 0.5 mM biotin-pentylamine substrate (Zedira) and 10 mM DTT and 5 mM  $\text{Ca}^{2+}$  at 37 °C for 45 min. Extravidin alkaline phosphatase was used in 1/2500 dilution. The color change during phosphatase reaction was followed at 405 nm using Synergy H1 device (BioTek). The transglutaminase reaction rate was calculated from the initial slopes of the kinetic curves gained from the phosphatase reaction in mAbs change per minute. To determine the pH-dependence of hTG4, the assay buffer was 8.5 or 7.5 0.1 M Tris-HCl buffer in the case of pH 8.5 and 7.5, but in the case of pH 7, 6.5, 6 and 5.5 50 mM MOPS buffer was used. To set up various reducing or oxidising conditions the reaction mixture was supplemented with 2.4 mM GSSG and 0, 0.24, 0.45, 1.25, or 2.4 mM GSH [24]. The ratio of  $[\text{GSH}]^2$  to  $[\text{GSSG}]$  was calculated from their final molar concentrations. The graphs were prepared using Graph Pad Prism 8 (GraphPad Software, San Diego, CA, USA)

#### 4.4. Nucleotide-binding assays

The nucleotide-binding of hTG4 was tested using BODIPY-FL-GTP $\gamma$ S [46] and GTP-agarose [48] based on previously described methods with some modifications. The protein-bound BODIPY-FL-GTP $\gamma$ S possesses higher fluorescence measured by Synergy H1 plate reader (Ex/Em:485/520;). The experiment was performed twice using 3 parallels in Nunc black microplates. As a positive control, 1000 nM recombinant hTG2 was used. For the GTP agarose pull-down assay, purified 5  $\mu$ g recombinant hTG4 or hTG2 were used. Bound transglutaminases were eluted by adding 2x denaturation buffer and 10 minutes of boiling. Western blot was developed using anti-polyHis-tag/HRP antibody in 1/15000 dilution.

#### 4.5. Differential scanning fluorimetry

The thermal stability of human TG4 was tested using differential scanning fluorimetry. The Prometheus NT.48 device makes possible the label-free detection of thermal unfolding measuring changes of intrinsic fluorescence of the protein (tyrosine and tryptophan) during increasing the temperature from 20 to 95°C. The hTG4 protein was diluted in 20 mM Tris-HCl buffer, pH 7.2 containing 150 mM NaCl, 1mM EDTA, 1 mM DTT.

#### 4.6. Dispase digestion

For testing the proteolytic stability, the reaction mixture contained 1  $\mu$ g TG4 or TG3 and 1  $\mu$ g dispase I or II and 5 mM  $\text{Ca}^{2+}$  in 0.1 M Tris-HCl buffer, pH 8.5. After 1 hour incubation at 37 °C, the reaction was stopped by the addition of 6x denaturation buffer (300 mM Tris-HCl pH 6.8, 12 m/v % SDS, 20 v/v % glycerol and 0.43 M  $\beta$ -mercapto-ethanol). The reaction mixture was analysed by Western blot, applying polyclonal anti-human epidermal transglutaminase (TG3) antibody (Zedira; 1/2000), monoclonal anti-TG4 antibody (Covalab; 1/2500) and monoclonal anti-polyHis/HRP antibody (Sigma; 1/20000).

#### 4.7. Exogenous expression of hTG4 in AD-293 cells

AD-293 cells were maintained in Dulbecos's Modified Eagle's Medium completed by 1 % PS, 1 % Pyruvate, 2 % Glutamine and 10% FBS (Thermo). Cells were plated on a 6 well plate. After reaching the 70% confluence, the FBS was lowered to 2 %, and antibiotics were omitted. The pTriEx-4 Ek/LIC hTG4

vector was constructed using pTriEx™-4 Ek/LIC Vector Kit (Novagen) based on the manufacturer instruction. The hTG4 cDNA containing pBH4 vector was used as a template with the gacgacgacaa-gatgagaattcagaccgaaaacctgtacttcc and gaggagaagcccgggtccaactcagttcctttc oligonucleotides. The transfection was performed based on the manufacturer's instructions using Lipofectamine 2000 (Thermo). After 3 hours, the transfection medium was replaced with a culture medium. The cells were collected 48 hours after transfection using RIPA buffer (50 mM Tris-HCl pH 7.5, 150 mM NaCl, 1 mM EDTA, 1 mM DTT, 0.5 (v/v) % NP-40, 10 (v/v) % glycerol and 1 mM PMSF and 1 % Protease inhibitor cocktail).

#### 4.8. Human TG4 substrate search

AD-293 cells were cultured until 90% confluency and collected by trypsinisation. After centrifugation at 1000 rpm for 10 minutes, the pellet was washed twice with ice-cold PBS. First, to prove that TG4 can use glutamine donor proteins from AD-293 cells, the cell pellet was resuspended in RIPA buffer and sonicated. The cell debris was removed by short centrifugation (5 min, 18000 g, 4°C). 10 µg AD-293 cell extracts were incubated for 1 hour, at 37 °C together with 0.2 mM BPA, with or without 4.2 µg rhTG4 in 100 mM Tris-HCl buffer, pH 8.5 containing 10 mM DTT, 1 mM PMSF, 1 % Protease inhibitor cocktail, and 10 mM EDTA or 5 mM CaCl<sub>2</sub>. The reaction was stopped by adding 6x denaturation buffer (300 mM Tris-HCl pH 6.8, 12 m/v % SDS, 20 v/v % glycerol and 0.43 M β-mercaptoethanol). Incorporated BPA was analysed by Western blot using Streptavidin/HRP (1/2500).

The incorporation reaction was repeated three times to identify the BPA labelled hTG4 substrate proteins on separated cytoplasmic (Cp) and nuclear (N) protein fractions of AD-293 cells. For the separation Nuclei Isolation Kit: Nuclei EZ Prep (Sigma) was used according to the manufacturer protocol. Then, 100 µg cytoplasmic or nuclear fraction of AD-293 cell extract were incubated in 0.1 M Tris-HCl buffer, pH 8.5 containing 5 mM CaCl<sub>2</sub>, 10 mM DTT, 200 µM BPA and 3 µg recombinant hTG4 for 2 hours, at 37 °C. The excess BPA was removed by dialysis against 0.1 M Tris HCl buffer, pH 8.5 using Spectra/Por 1 Dialysis Membrane Standard RC Tubing (MWCO 6-8 kD). BPA modified proteins were isolated and enriched using High Capacity Neutravidin Agarose Resin (Thermo). After equilibration (0.1 M Tris-HCl buffer, pH 8.5), the resin was incubated with the dialysed reaction mixture for 1 hour, at 4 °C under continuous rotation. The beads were washed 3 times, and the labelled proteins were eluted by the addition of 6xdenaturation buffer, and consequent boiling for 15 minutes. The supernatant was used for further analysis. In the case of control samples, 100 µg of AD-293 protein extract was applied for incorporation, treated similarly to the other samples.

The eluted proteins were loaded on 10% polyacrylamide gel, but they were only run into the separating gel. After Coomassie staining, the protein bands were excised from the gel, and the dye was removed by washing with nanopure water. After reduction with DTT, and alkylation using iodoacetamide, the proteins were digested with trypsin overnight, at 37 °C. The extracted peptides were dried in Speed-Vac then reconstituted in 10 µL 1 % formic acid. Half of the sample was used for the analysis. First, the salt and accompanying buffer components were removed and the sample was enriched with ACQUITY UPLC Symmetry C18 (Waters) desalting column. Then the peptides were separated using Acclaim PepMap RSLC (Thermo) column (300 nL/min flow rate, 180 minutes water-acetonitrile gradient). Next, the samples were analysed with Easy nLC1200 (Thermo) nanoUPCL- Orbitrap Fusion (Thermo) MS/MS system. Data collection was performed in Data Dependent Acquisition mode. The Orbitrap analyser was scanning the samples with 6000 mass resolution between 350-1600 m/z range and the 14 most intensive peaks were used for the further fragmentation, when CID (35%) was applied and the product ions were scanned in the ion trap (MS/MS). The mass spectrometry analyses were carried out at the Proteomics Core Facility, Department of Biochemistry and Molecular Biology, University of Debrecen.

Protein identification based on the peptide sequences (MS/MS spectra) was done by MaxQuant 1.6.2.10. search engine [49] using SwissProt/Uniprot database. The results were imported into Scaffold 4.8.9 program [Proteome Software, Inc], and for the protein identification, the next settings were applied: protein threshold 1.0% False Discovery Rate (FDR), the minimum necessary identified peptide

number 3 for each protein, and peptide threshold 0.1% FDR. In the case of determination of BPA labelled proteins, non-FDR filtering mode and one peptide per protein criteria were used. In addition, the MS/MS spectrum of each peptide was verified by the presence of at least four consequent b or y fragment ions. The data is deposited to ProteomeXchange Consortium[26] via MassIVE with the PXD028174 data identifier (link: <http://proteomecentral.proteomexchange.org/cgi/GetDataset?ID=PXD028174>).

#### 4.9. Western blot

The Western blot was performed based on the general protocol. SDS-PAGE with 10% gel was performed and followed by semi-dry blotting method using PVDF membrane (Immobilon-P membrane, 0.45 µm) using Bio-Rad Trans-Blot SD Semi-Dry transfer cell device. 5 (m/v) % low-fat milk powder in TTBS was used for blocking, for 1 hour at room temperature or overnight at 4 °C. Primary antibodies were applied in 0.5 (m/v) % low-fat milk powder containing TTBS for 1 hour at room temperature or overnight at 4 °C. After washing 4 times for 8 minutes with TTBS, the secondary antibody was added in TTBS containing 0.5 (m/v) % low-fat milk powder. The following antibodies were used in the study: Monoclonal Transglutaminase-4 antibody (1C6) (Covalab) (1/2500), Polyclonal antibody to human epidermal transglutaminase (TG3) (Zedira) (1/2000), Monoclonal anti-polyHis/HRP antibody (Sigma) (1/20000), Streptavidin/HRP (1/2500) (BioLegend), Goat-anti-mouse IgG (Advansta) (1/10000) and Goat-anti-rabbit IgG (H+L), HRP conjugate (Advansta) (1/10000).

**Supplementary Materials:** Figure S1: Alignment of hTG4 and hTG2 sequences., Table S1: Detected hTG4 peptides in proteomics databases, S2: Potential hTG4 expressing tissues, S3: Identified proteins of the cytoplasmic, nuclear and control samples upon hTG4 substrate search.

**Author Contributions:** Conceptualisation, R.K. and I.R.K.-Sz.; methodology, Zs.Cs.-Sz., R.K. and I.R.K.-Sz.; software, Zs. Cs.-Sz.; formal analysis, Zs.Cs.-Sz., B.B. and R.K.; investigation, Zs.Cs.-Sz., B.B. and R. K.; resources, S.E.A., data curation, Zs. Cs.-Sz.; writing—original draft preparation, R.K. and Zs.Cs.-Sz.; writing—review and editing, R.K., I.R.K.-Sz. and L.F.; funding acquisition, I.R.K.-Sz. and L. F. All authors have read and agreed to the published version of the manuscript.

**Funding:** This research was funded by the European Union and the European Regional Development Fund (GINOP-2.3.2-15-2016-00015, GINOP-2.3.3-15-2016-00020), and the National Research, Development and Innovation Office of Hungary (NKFIH-K120392, K129139).

**Data Availability Statement:** MS data was deposited to ProteomeXchange Consortium [26] via MassIVE with the dataset identifier PXD028174 (MSV000088030). Further data will be available upon request from the corresponding author.

**Acknowledgments:** R.K. was supported by the János Bolyai Fellowship of the Hungarian Academy of Sciences and Zs.Cs.-Sz. got support from the ÚNKP-20-3 New Excellence Program of the Ministry for Innovation and Technology from the source of the National Research, Development and Innovation Fund and training from the EFOP-3.6.1-16-2016-00022 Debrecen Venture Catapult Program of Ministry for Innovation and Technology in Hungary. We would like to thank Éva Csósz for the critical reading of the manuscript and Jennifer Nagy for the technical assistance. We are grateful to Ferenc Erdódi for enabling us to use the NanoTemper Prometheus NT.48. We appreciate the service and helpful comments of Éva Csósz and Gergő Kalló from the Proteomics Core Facility, Department of Biochemistry and Molecular Biology, University of Debrecen.

**Conflicts of Interest:** The authors declare no conflict of interest.

#### Abbreviations

TG2, 3, 4, 7: transglutaminase 2, 3, 4, 7, respectively

TGp: prostate transglutaminase (TG4)

FXIII-A: human blood coagulation factor XIII-A

SDS: Sodium dodecyl sulfate

BPA: biotin-pentylamine



---

GSH/GSSG: reduced/oxidised glutathione

nanoDSF: nano differential scanning fluorimetry

## References:

1. Lorand, L.; Graham, R.M. Transglutaminases: crosslinking enzymes with pleiotropic functions. *Nat. Rev. Mol. Cell Biol.* **2003**, *4*, 140-56.
2. Eckert, R.L.; Kaartinen, M.T.; Nurminskaya, M.; Belkin, A.M.; Colak, G.; Johnson, G.V.; Mehta K. Transglutaminase regulation of cell function. *Physiol. Rev.* **2014**, *94*, 383-417.
3. Muszbek, L.; Bereczky, Z.; Bagoly, Z.; Komáromi, I.; Katona, É. Factor XIII: a coagulation factor with multiple plasmatic and cellular functions. *Physiol. Rev.* **2011**, *91*, 931-72.
4. Williams-Ashman, H.G. Transglutaminases and the clotting of mammalian seminal fluids. *Mol. Cell Biochem.* **1984**, *58*, 51-61.
5. Dean, M.D. Genetic disruption of the copulatory plug in mice leads to severely reduced fertility. *PLoS Genet.* **2013**, *9*, e1003185.
6. Mukherjee, D.C.; Agrawal, A.K.; Manjunath, R.; Mukherjee, A.B. Suppression of epididymal sperm antigenicity in the rabbit by uteroglobin and transglutaminase in vitro. *Science.* **1983**, *219*, 989-91.
7. Peluso, G.; Porta, R.; Esposito, C.; Tufano, M.A.; Toraldo, R.; Vuotto, M.L.; Ravagnan, G.; Metafora, S. Suppression of rat epididymal sperm immunogenicity by a seminal vesicle secretory protein and transglutaminase both in vivo and in vitro. *Biol. Reprod.* **1994**, *50*, 593-602.
8. Johnson, K.B.; Petersen-Jones, H.; Thompson, J.M.; Hitomi, K.; Itoh, M.; Bakker, E.N.; Johnson, G.V.; Colak, G.; Watts, S.W. Vena cava and aortic smooth muscle cells express transglutaminases 1 and 4 in addition to transglutaminase 2. *Am. J. Physiol. Heart Circ. Physiol.* **2012**, *302*, H1355-66.
9. Seitz, J.; Keppler, C.; Hüntemann, S.; Rausch, U.; Aumüller, G. Purification and molecular characterisation of a secretory transglutaminase from coagulating gland of the rat. *Biochim. Biophys. Acta.* **1991**, *1078*, 139-46.
10. Esposito, C.; Pucci, P.; Amoresano, A.; Marino, G.; Cozzolino, A.; Porta, R. Transglutaminase from rat coagulating gland secretion. Post-translational modifications and activation by phosphatidic acids. *J. Biol. Chem.* **1996**, *271*, 27416-23.
11. Spina, A.M.; Esposito, C.; Pagano, M.; Chiosi, E.; Mariniello, L.; Cozzolino, A.; Porta, R.; Illiano, G. GTPase and transglutaminase are associated in the secretion of the rat anterior prostate. *Biochem. Biophys. Res. Commun.* **1999**, *260*, 351-6.
12. Mariniello, L.; Esposito, C.; Caputo, I.; Sorrentino, A.; Porta, R. N-terminus end of rat prostate transglutaminase is responsible for its catalytic activity and GTP binding. *Int. J. Biochem. Cell Biol.* **2003**, *35*, 1098-108.
13. Tseng, H.C.; Lin, H.J.; Sudhakar, Gandhi, P.S.; Wang, C.Y.; Chen, Y.H. Purification and identification of transglutaminase from mouse coagulating gland and its crosslinking activity among seminal vesicle secretion proteins. *J. Chromatogr. B. Analyt. Technol. Biomed. Life Sci.* **2008**, *876*, 198-202.
14. Tseng, H.C.; Tang, J.B.; Gandhi, P.S.; Luo, C.W.; Ou, C.M.; Tseng, C.J.; Lin, H.J.; Chen, Y.H. Mutual adaptation between mouse transglutaminase 4 and its native substrates in the formation of copulatory plug. *Amino Acids.* **2012**, *42*, 951-60.
15. Peter, A.; Lilja, H.; Lundwall, A.; Malm, J. Semenogelin I and semenogelin II, the major gel-forming proteins in human semen, are substrates for transglutaminase. *Eur. J. Biochem.* **1998**, *252*, 216-21.
16. Porta, R.; Esposito, C.; De, Santis, A.; Fusco, A.; Iannone, M.; Metafora, S. Sperm maturation in human semen: role of transglutaminase-mediated reactions. *Biol. Reprod.* **1986**, *35*, 965-70.
17. Perez, Alea, M.; Thomas, V.; Martin, G.; El, Alaoui, S. Identification of human salivary transglutaminases. *Amino Acids.* **2013**, *44*, 245-50.
18. Hogan, M.C.; Johnson, K.L.; Zenka, R.M.; Charlesworth, M.C.; Madden, B.J.; Mahoney, D.W.; Oberg, A.L.; Huang, B.Q.; Leontovich, A.A.; Nesbitt, L.L.; Bakeberg, J.L.; McCormick, D.J.; Bergen, H.R.; Ward, C.J. Subfractionation, characterisation, and in-depth proteomic analysis of glomerular membrane vesicles in human urine. *Kidney Int.* **2014**, *85*, 1225-37.
19. Jiang, W.G.; Ablin, R.J.; Kynaston, H.G.; Mason, M.D. The prostate transglutaminase (TGase-4, TGaseP) regulates the interaction of prostate cancer and vascular endothelial cells, a potential role

- for the ROCK pathway. *Microvasc. Res.* **2009**, *77*, 150-7.
20. Davies, G.; Ablin, R.J.; Mason, M.D.; Jiang, W.G. Expression of the prostate transglutaminase (TGase-4) in prostate cancer cells and its impact on the invasiveness of prostate cancer. *J. Exp. Ther. Oncol.* **2007**, *6*:257-64.
21. Landegren, N.; Sharon, D.; Shum, A.K.; Khan, I.S.; Fasano, K.J.; Hallgren, Å.; Kampf, C.; Freyhult, E.; Ardesjö-Lundgren, B.; Alimohammadi, M.; Rathsmann, S.; Ludvigsson, J.F.; Lundh, D.; Motrich, R.; Rivero, V.; Fong, L.; Giwercman, A.; Gustafsson, J.; Perheentupa, J.; Husebye, E.S.; Anderson, M.S.; Snyder, M.; Kämpe, O. Transglutaminase 4 as a prostate autoantigen in male subfertility. *Sci. Transl. Med.* **2015**, *7*, 292ra101.
22. Tian, X.; Pascal, G.; Fouchécourt, S.; Pontarotti, P.; Monget, P. Gene birth, death, and divergence: the different scenarios of reproduction-related gene evolution. *Biol. Reprod.* **2009**, *80*, 616-21.
23. Thangaraju, K.; Király, R.; Demény, M.A.; András, Mótóyán, J.; Fuxreiter, M.; Fésüs, L. Genomic variants reveal differential evolutionary constraints on human transglutaminases and point towards unrecognised significance of transglutaminase 2. *PLoS One.* **2017**, *12*, e0172189.
24. Stammaes, J.; Pinkas, D.M.; Fleckenstein, B.; Khosla, C.; Sollid, L.M. Redox regulation of transglutaminase 2 activity. *J. Biol. Chem.* **2010**, *285*, 25402-9.
25. Uhlén, M.; Fagerberg, L.; Hallström, B.M.; Lindskog, C.; Oksvold, P.; Mardinoglu, A.; Sivertsson, Å.; Kampf, C.; Sjöstedt, E.; Asplund, A.; Olsson, I.; Edlund, K.; Lundberg, E.; Navani, S.; Szigartyo, C.A.; Odeberg, J.; Djureinovic, D.; Takanen, J.O.; Hober, S.; Alm, T.; Edqvist, P.H.; Berling, H.; Tegel, H.; Mulder, J.; Rockberg, J.; Nilsson, P.; Schwenk, J.M.; Hamsten, M.; von Feilitzen, K.; Forsberg, M.; Persson, L.; Johansson, F.; Zwahlen, M.; von Heijne, G.; Nielsen, J.; Pontén, F. Proteomics. Tissue-based map of the human proteome. *Science.* **2015**, *347*, 1260419.
26. Deutsch, E.W.; Csordas, A.; Sun, Z.; Jarnuczak, A.; Perez-Riverol, Y.; Ternent, T.; Campbell, D.S.; Bernal-Llinares, M.; Okuda, S.; Kawano, S.; Moritz, R.L.; Carver, J.J.; Wang, M.; Ishihama, Y.; Bandeira, N.; Hermjakob, H.; Vizcaíno, J. A. The ProteomeXchange consortium in 2017: supporting the cultural change in proteomics public data deposition. *Nucleic Acids Res.* **2017**, *45*, D1100-D1106.
27. Desiere, F.; Deutsch, E.W.; King, N.L.; Nesvizhskii, A.I.; Mallick, P.; Eng, J.; Chen, S.; Eddes, J.; Loevenich, S.N.; Aebersold, R. The PeptideAtlas project. *Nucleic Acids Res.* **2006**, *34*, D655-8.
28. Wilhelm, M.; Schlegl, J.; Hahne, H.; Gholami, A.M.; Lieberenz, M.; Savitski, M.M.; Ziegler, E.; Butzmann, L.; Gessulat, S.; Marx, H.; Mathieson, T.; Lemeer, S.; Schnatbaum, K.; Reimer, U.; Wenschuh, H.; Mollenhauer, M.; Slotta-Huspenina, J.; Boese, J.H.; Bantscheff, M.; Gerstmaier, A.; Faerber, F.; Kuster, B. Mass-spectrometry-based draft of the human proteome. *Nature.* **2014**, *509*, 582-7.
29. Pietroni, V.; Di, Giorgi, S.; Paradisi, A.; Ahvazi, B.; Candi, E.; Melino, G. Inactive and highly active, proteolytically processed transglutaminase-5 in epithelial cells. *J. Invest. Dermatol.* **2008**, *128*, 2760-6.
30. Rivera-Gonzalez, G. C.; Droop, A.P.; Rippon, H.J.; Tiemann, K.; Pellacani, D.; Georgopoulos, L.J.; Maitland, N.J. Retinoic acid and androgen receptors combine to achieve tissue specific control of human prostatic transglutaminase expression: a novel regulatory network with broader significance. *Nucleic Acids Res.* **2012**, *40*, 4825-40.
31. Lopez-Bujanda, Z.A.; Obradovic, A.; Nirschl, T.R.; Crowley, L.; Macedo, R.; Papachristodoulou, A.; O'Donnell, T.; Laserson, U.; Zarif, J.C.; Reshef, R.; Yuan, T.; Soni, M.K.; Antonarakis, E.S.; Haffner, M.C.; Larman, H.B.; Shen, M.M.; Muranski, P.; Drake, C.G. TGM4: an immunogenic prostate-restricted antigen. *J. Immunother. Cancer.* **2021**, *9*, e001649.
32. Drabovich, A.P.; Saraon, P.; Drabovich, M.; Karakosta, T.D.; Dimitromanolakis, A.; Hyndman, M.E.; Jarvi, K.; Diamandis, E.P. Multi-omics Biomarker Pipeline Reveals Elevated Levels of Protein-glutamine Gamma-glutamyltransferase 4 in Seminal Plasma of Prostate Cancer Patients. *Mol. Cell Proteomics.* **2019**, *18*, 1807-1823.
33. Moore, W.T.; Jr, Murtaugh, M.P.; Davies, P.J. Retinoic acid-induced expression of tissue transglutaminase in mouse peritoneal macrophages. *J. Biol. Chem.* **1984**, *259*, 12794-802.
34. Bhuyan, A.K. On the mechanism of SDS-induced protein denaturation. *Biopolymers.* **2010**, *93*, 186-99.
35. Carnahan, S.J.; Jensen-Seaman, M.I. Hominoid seminal protein evolution and ancestral mating behavior. *Am. J. Primatol.* **2008**, *70*, 939-48.

36. Liu, S.; Cerione, R.A.; Clardy, J. Structural basis for the guanine nucleotide-binding activity of tissue transglutaminase and its regulation of transamidation activity. *Proc. Natl. Acad. Sci. U S A.* **2002**, *99*, 2743-7.
37. Jiang, W.G.; Ablin, R.J. Prostate transglutaminase: a unique transglutaminase and its role in prostate cancer. *Biomark. Med.* **2011**, *5*, 285-91.
38. Kim, S.Y.; Chung, S.I.; Steinert, P.M. Highly active soluble processed forms of the transglutaminase 1 enzyme in epidermal keratinocytes. *J. Biol. Chem.* **1995**, *270*, 18026-35.
39. Hitomi, K.; Yamagiwa, Y.; Ikura, K.; Yamanishi, K.; Maki, M. Characterization of human recombinant transglutaminase 1 purified from baculovirus-infected insect cells. *Biosci. Biotechnol. Biochem.* **2000**, *64*, 2128-37.
40. Cheng, T.; Hitomi, K.; van Vlijmen-Willems, I.M.; de Jongh, G.J.; Yamamoto, K.; Nishi, K.; Watts, C.; Reinheckel, T.; Schalkwijk, J.; Zeeuwen, P.L. Cystatin M/E is a high affinity inhibitor of cathepsin V and cathepsin L by a reactive site that is distinct from the legumain-binding site. A novel clue for the role of cystatin M/E in epidermal cornification. *J. Biol. Chem.* **2006**, *281*, 15893-9.
41. Hitomi, K.; Kanehiro, S.; Ikura, K.; Maki, M. Characterization of recombinant mouse epidermal-type transglutaminase (TGase 3): regulation of its activity by proteolysis and guanine nucleotides. *J. Biochem.* **1999**, *125*, 1048-54.
42. Kanchan, K.; Ergülen, E.; Király, R.; Simon-Vecsei, Z.; Fuxreiter, M.; Fésüs, L. Identification of a specific one amino acid change in recombinant human transglutaminase 2 that regulates its activity and calcium sensitivity. *Biochem. J.* **2013**, *455*, 261-72.
43. Csoz, E.; Meskó, B.; Fésüs, L. Transdab wiki: the interactive transglutaminase substrate database on web 2.0 surface. *Amino Acids.* **2009**, *36*, 615-7.
44. Tseng, H.C.; Lin, H.J.; Tang, J.B.; Gandhi, P.S.; Chang, W.C.; Chen, Y.H. Identification of the major TG4 crosslinking sites in the androgen-dependent SVS I exclusively expressed in mouse seminal vesicle. *J. Cell Biochem.* **2009**, *107*, 899-907.
45. Yu, W.; Yang, L.; Li, T.; Zhang, Y. Cadherin Signaling in Cancer: Its Functions and Role as a Therapeutic Target. *Front. Oncol.* **2019**, *9*, 989.
46. Biri, B.; Kiss, B.; Király, R.; Schlosser, G.; Láng, O.; Kóhidai, L.; Fésüs, L.; Nyitray L. Metastasis-associated S100A4 is a specific amine donor and an activity-independent binding partner of transglutaminase-2. *Biochem. J.* **2016**, *473*, 31-42.
47. Slaughter, T.F.; Achyuthan, K.E.; Lai, T.S.; Greenberg, C.S. A microtiter plate transglutaminase assay utilising 5-(biotinamido)pentylamine as substrate. *Anal. Biochem.* **1992**, *205*, 166-71.
48. Ruan, Q.; Tucholski, J.; Gundemir, S.; Johnson, Voll, G.V. The Differential Effects of R580A Mutation on Transamidation and GTP Binding Activity of Rat and Human Type 2 Transglutaminase. *Int. J. Clin. Exp. Med.* **2008**, *1*, 248-59.
49. Cox, J.; Mann, M. MaxQuant enables high peptide identification rates, individualised p.p.b.-range mass accuracies and proteome-wide protein quantification. *Nat. Biotechnol.* **2008**, *26*, 1367-72.
